# Supplementary material for: Catalytic decomposition of N2O over Rh/Zn–Al2O3 catalysts
Source: Royal Society of Chemistry journal article supplement (doi:10.1039/c6ra25388a), 2017-01-01
Supplement: c6ra25388a1.pdf [file c6ra25388a1.pdf]

## Electronic Supplementary Information (ESI)

### Catalytic decomposition of N<sub>2</sub>O over Rh/Zn-Al<sub>2</sub>O<sub>3</sub> catalysts

Chengyun Huang,<sup>a</sup> Zhen Ma,<sup>\*b</sup> Changxi Miao,<sup>\*c</sup> Yinghong Yue,<sup>a</sup> Weiming Hua<sup>\*a</sup> and Zi Gao<sup>a</sup>

<sup>a</sup> Shanghai Key Laboratory of Molecular Catalysis and Innovative Materials, Department of Chemistry, Fudan University, Shanghai 200433, PR China

<sup>b</sup> Shanghai Key Laboratory of Atmospheric Particle Pollution and Prevention (LAP<sup>3</sup>), Department of Environmental Science and Engineering, Fudan University, Shanghai 200433, PR China

<sup>c</sup> Shanghai Research Institute of Petrochemical Technology SINOPEC, Shanghai 201208, PR China

*E-mail addresses:* [zhenma@fudan.edu.cn](mailto:zhenma@fudan.edu.cn) (Z. Ma), [miaocx.sshy@sinopec.com](mailto:miaocx.sshy@sinopec.com) (C. Miao), [wmhua@fudan.edu.cn](mailto:wmhua@fudan.edu.cn) (W. Hua).

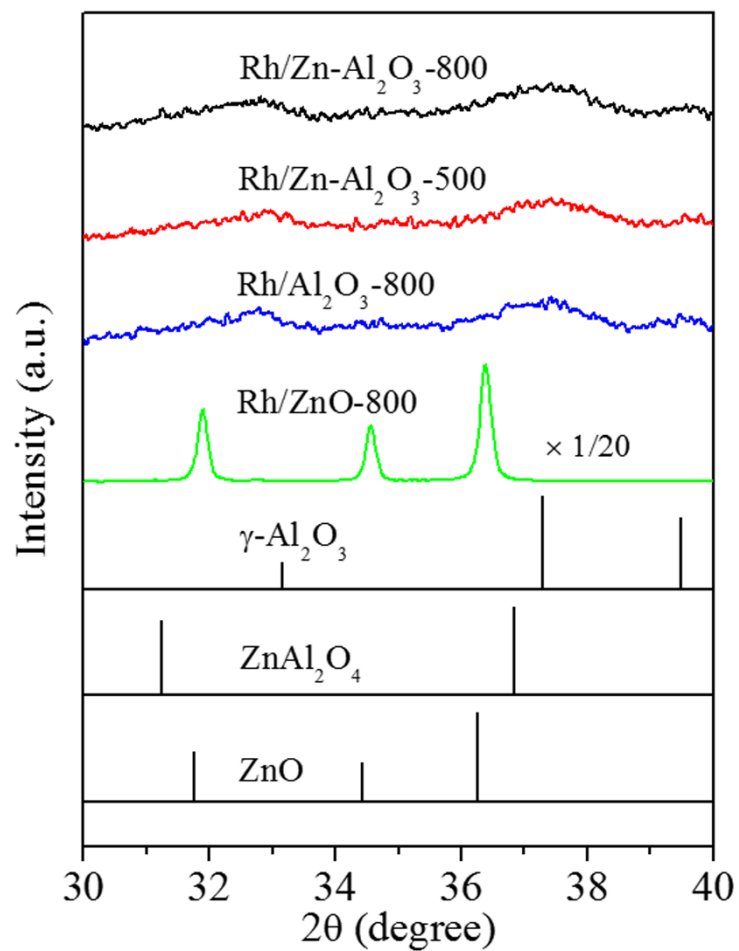

**Fig. S1.** XRD patterns of the catalysts and standard patterns of  $\gamma$ -Al<sub>2</sub>O<sub>3</sub> (PDF#47-1308), ZnAl<sub>2</sub>O<sub>4</sub> (PDF#05-0699), and ZnO (PDF#36-1451) in the  $2\theta = 30\text{--}40^\circ$  region.

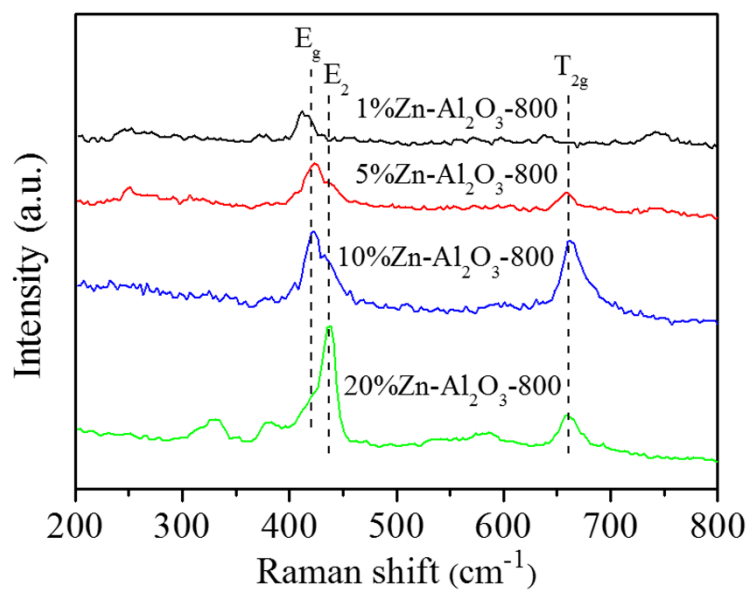

**Fig. S2.** Raman spectra for Zn-Al<sub>2</sub>O<sub>3</sub>-800 with different Zn content.

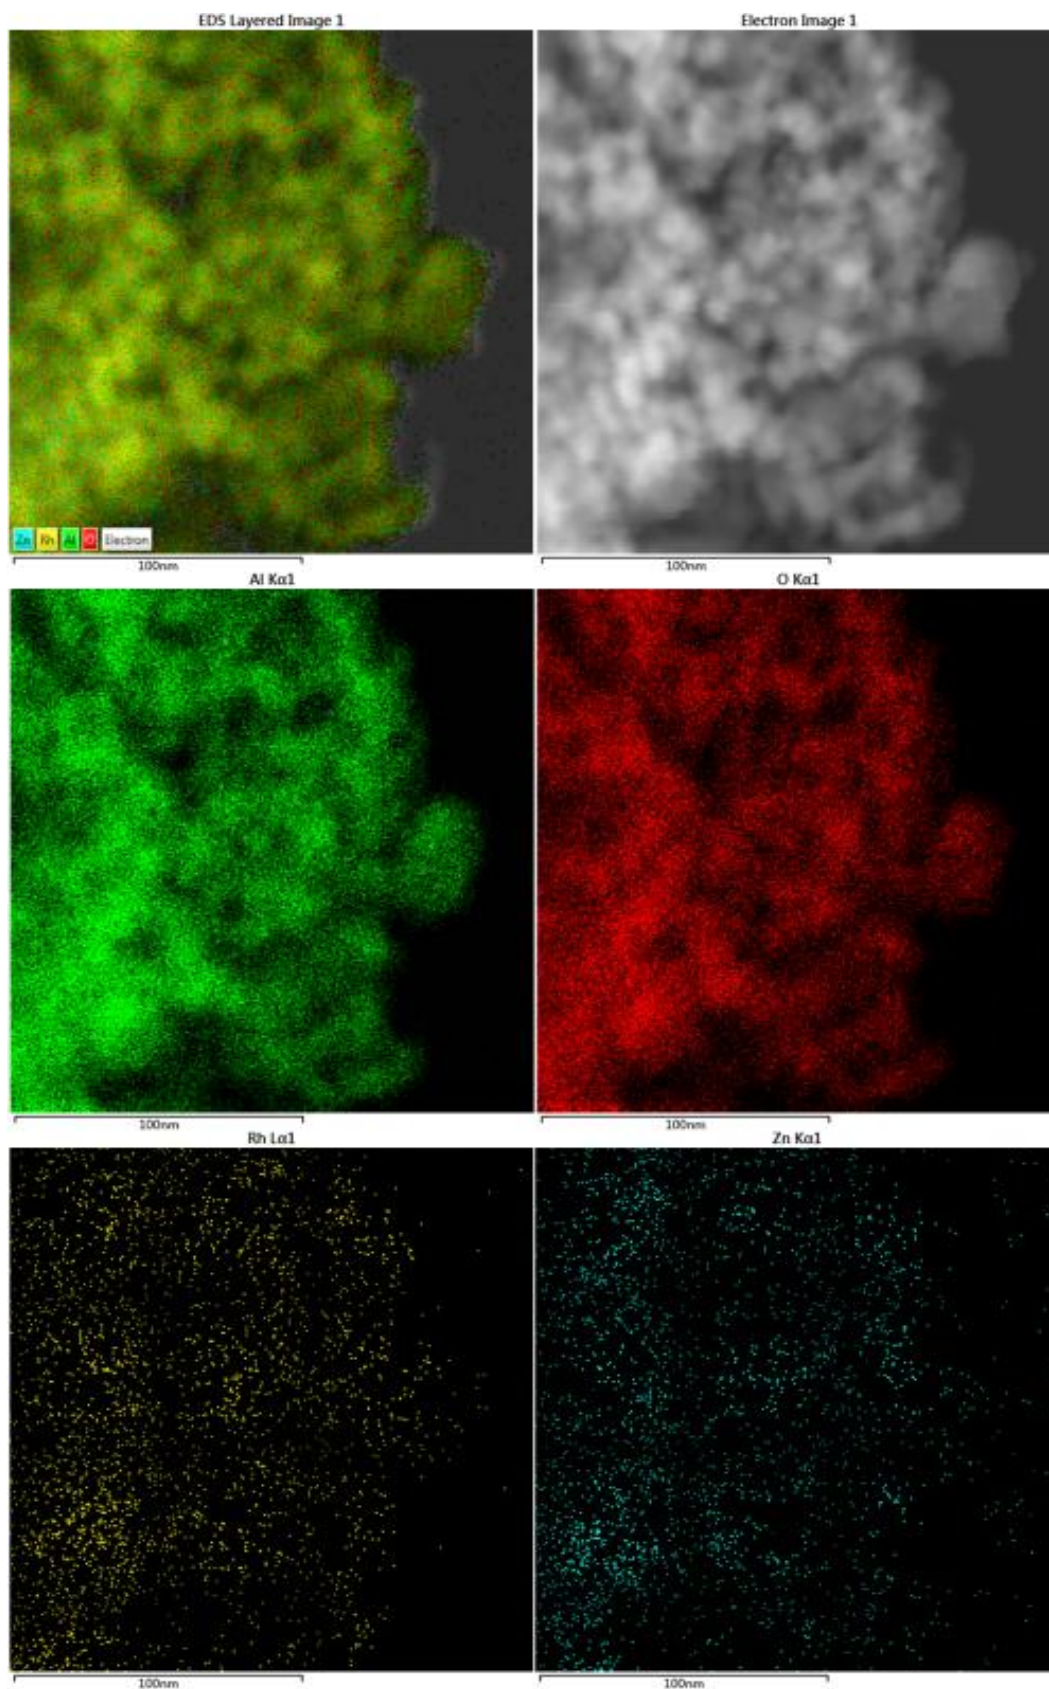

Fig. S3. EDX elemental mapping for Rh/Zn-Al<sub>2</sub>O<sub>3</sub>-800.

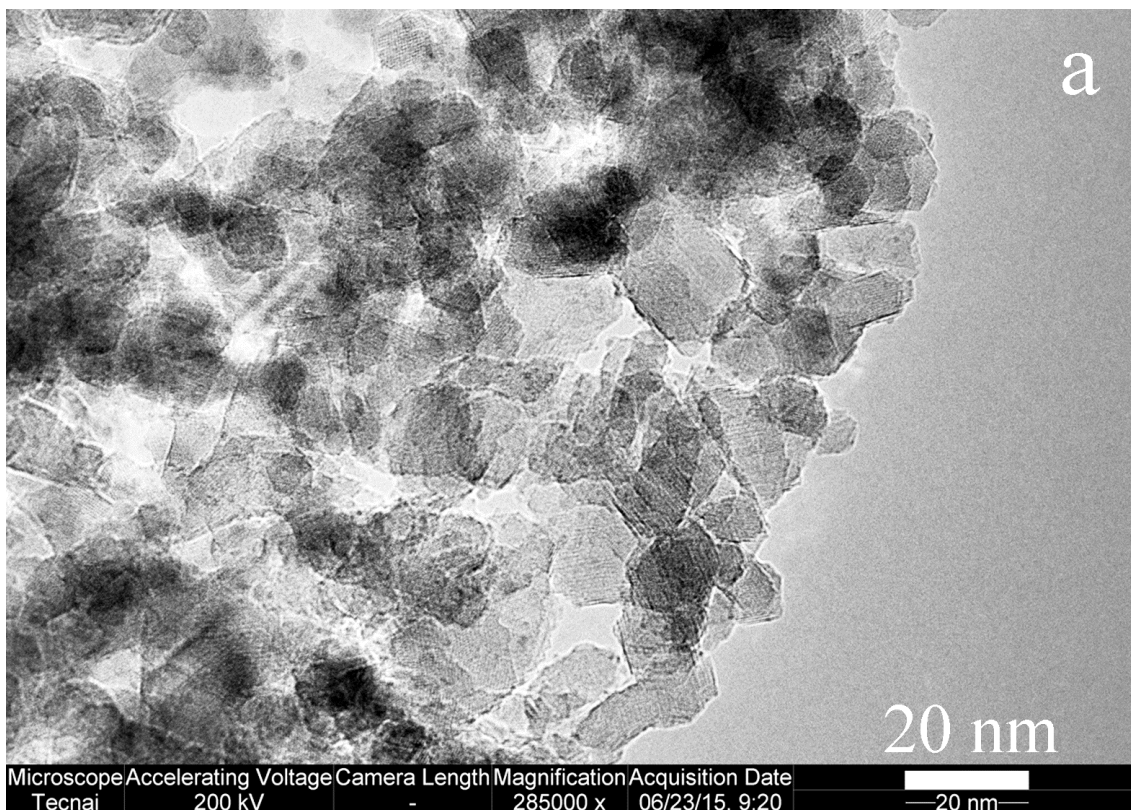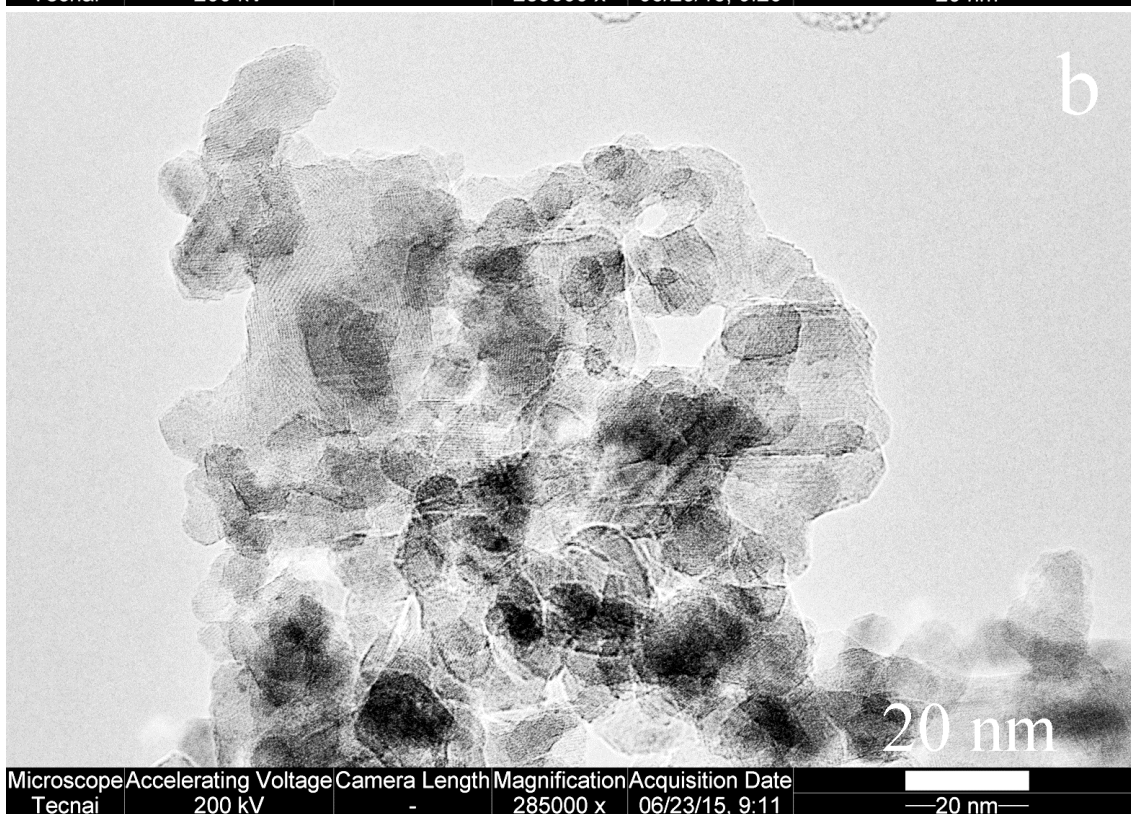



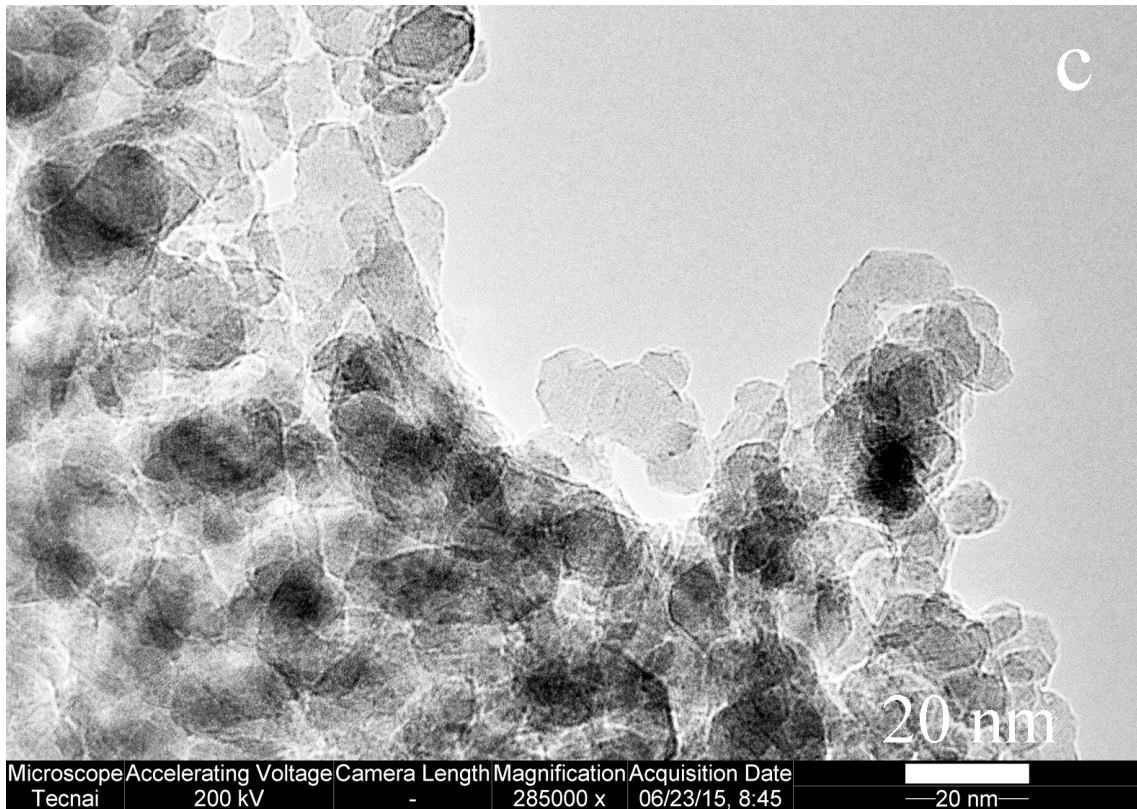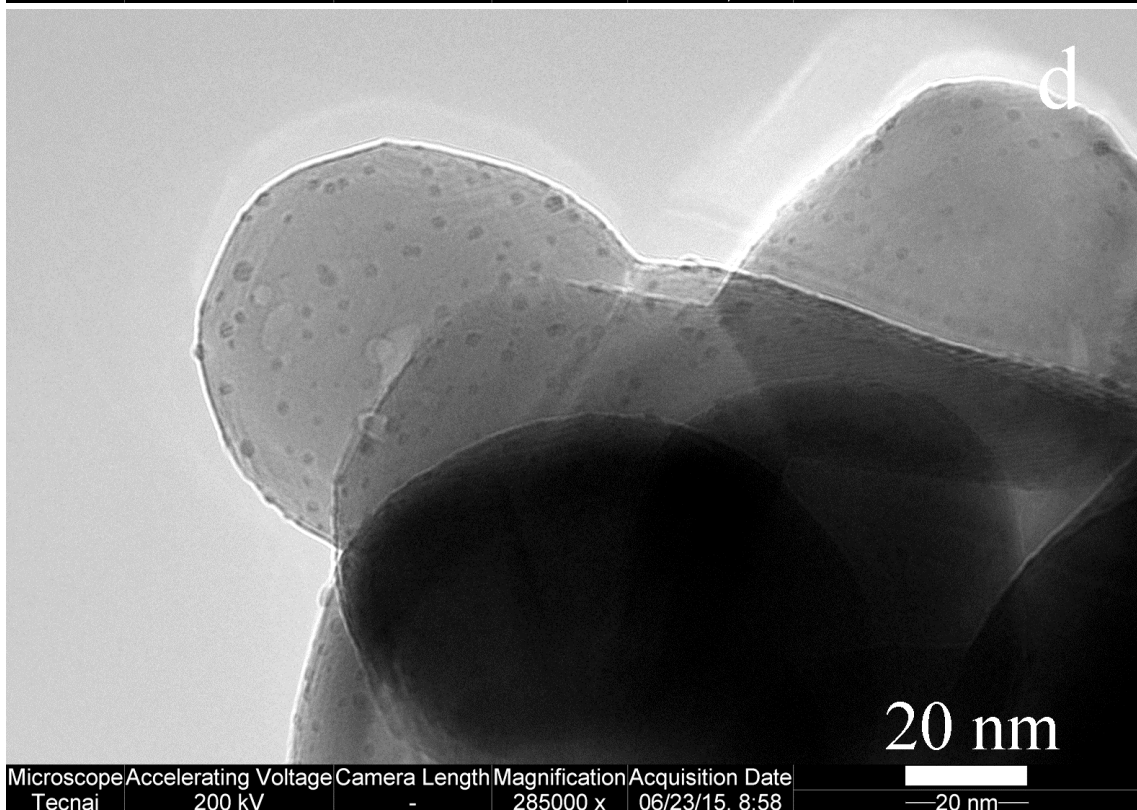

**Fig. S4.** TEM graphs with larger size for (a) Rh/Zn-Al<sub>2</sub>O<sub>3</sub>-800, (b) Rh/Zn-Al<sub>2</sub>O<sub>3</sub>-500, (c) Rh/Al<sub>2</sub>O<sub>3</sub>-800, and (d) Rh/ZnO-800.

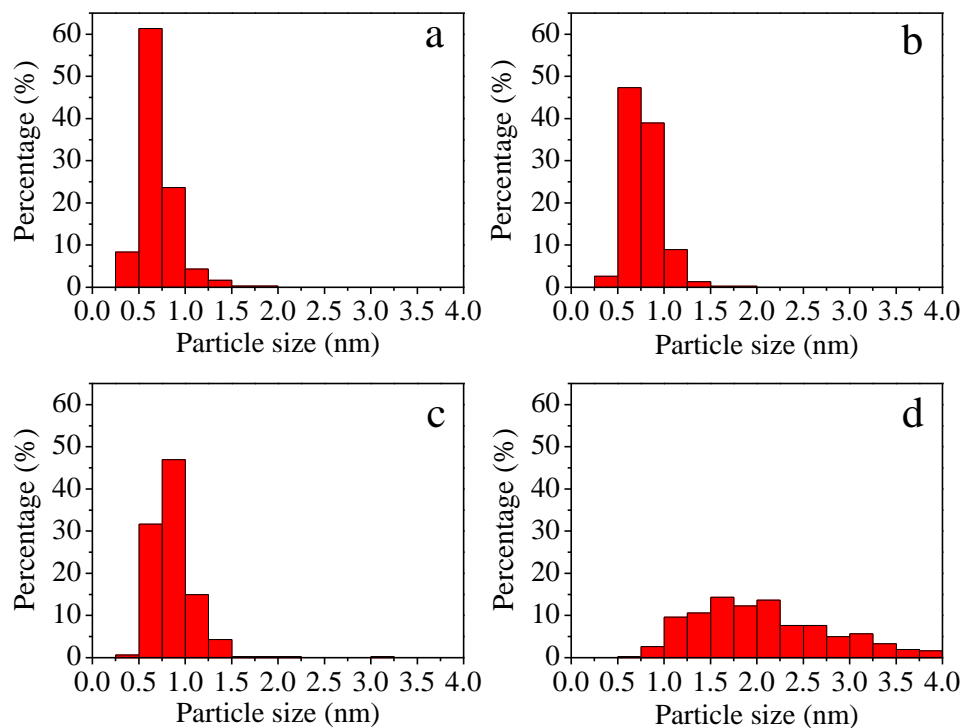

**Fig. S5.** Distribution of  $\text{Rh}_2\text{O}_3$  particle sizes for (a) Rh/Zn- $\text{Al}_2\text{O}_3$ -800, (b) Rh/Zn- $\text{Al}_2\text{O}_3$ -500, (c) Rh/ $\text{Al}_2\text{O}_3$ -800, and (d) Rh/ZnO-800.

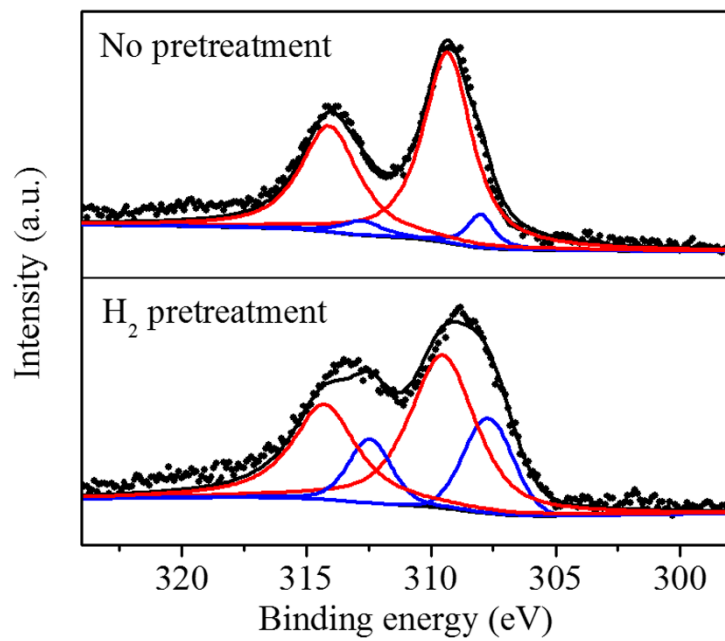

**Fig. S6.** Rh 3d XPS spectra of Rh/Zn-Al<sub>2</sub>O<sub>3</sub>-800 without being pretreated or after being pretreated in 4% H<sub>2</sub> (balance He) at 400 °C for 2 h.



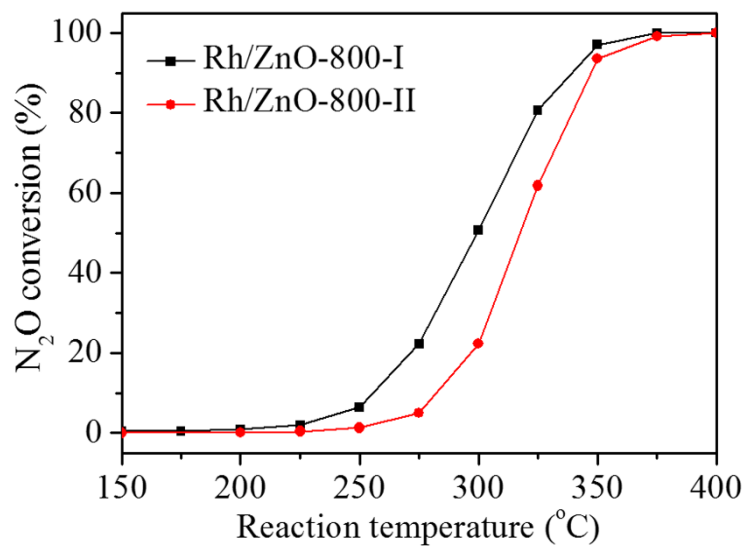

**Fig. S7.** Conversion of N<sub>2</sub>O on Rh/ZnO-800 catalysts prepared using ZnO supports prepared differently. I: ZnO support was prepared by precipitation. II: ZnO support was prepared by calcining Zn(NO<sub>3</sub>)<sub>2</sub>·6H<sub>2</sub>O at 800 °C for 4 h.

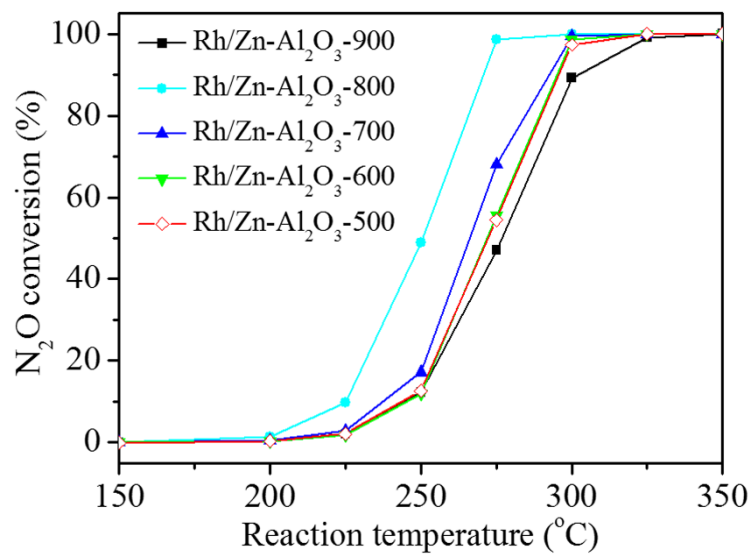

**Fig. S8.** Conversion of N<sub>2</sub>O on Rh/Zn-Al<sub>2</sub>O<sub>3</sub> catalysts prepared by using Zn-Al<sub>2</sub>O<sub>3</sub> supports calcined at different temperatures. The loading of Zn is 1 wt%.

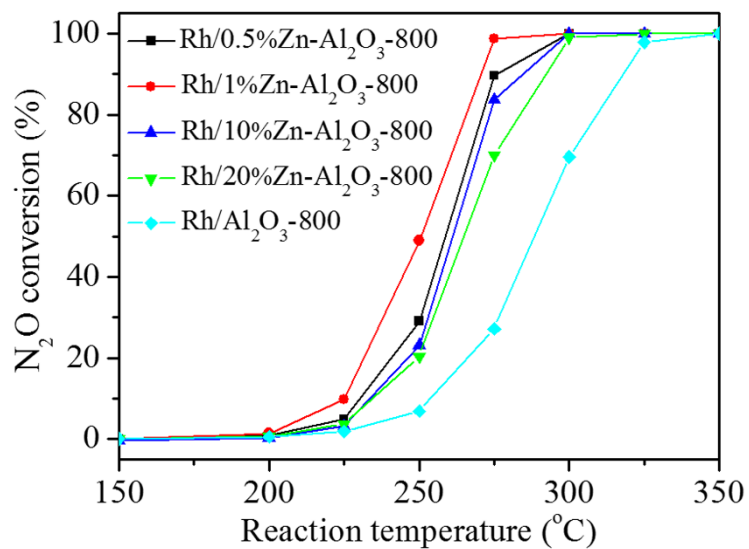

**Fig. S9.** Conversion of N<sub>2</sub>O on Rh/Zn-Al<sub>2</sub>O<sub>3</sub>-800 catalysts with different Zn loadings.

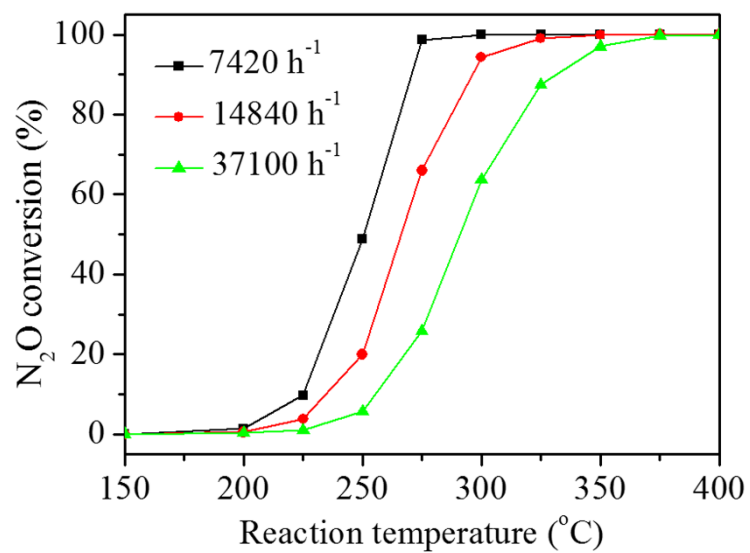

**Fig. S10.** Conversion of N<sub>2</sub>O on Rh/1%Zn-Al<sub>2</sub>O<sub>3</sub>-800 at different GHSVs.

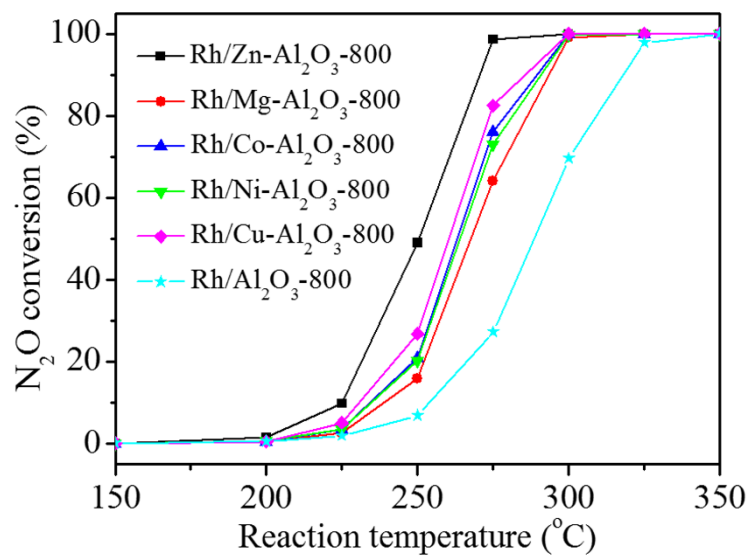

**Fig. S11.** Conversion of N<sub>2</sub>O on different Rh/M-Al<sub>2</sub>O<sub>3</sub>-800 catalysts as a function of reaction temperature.

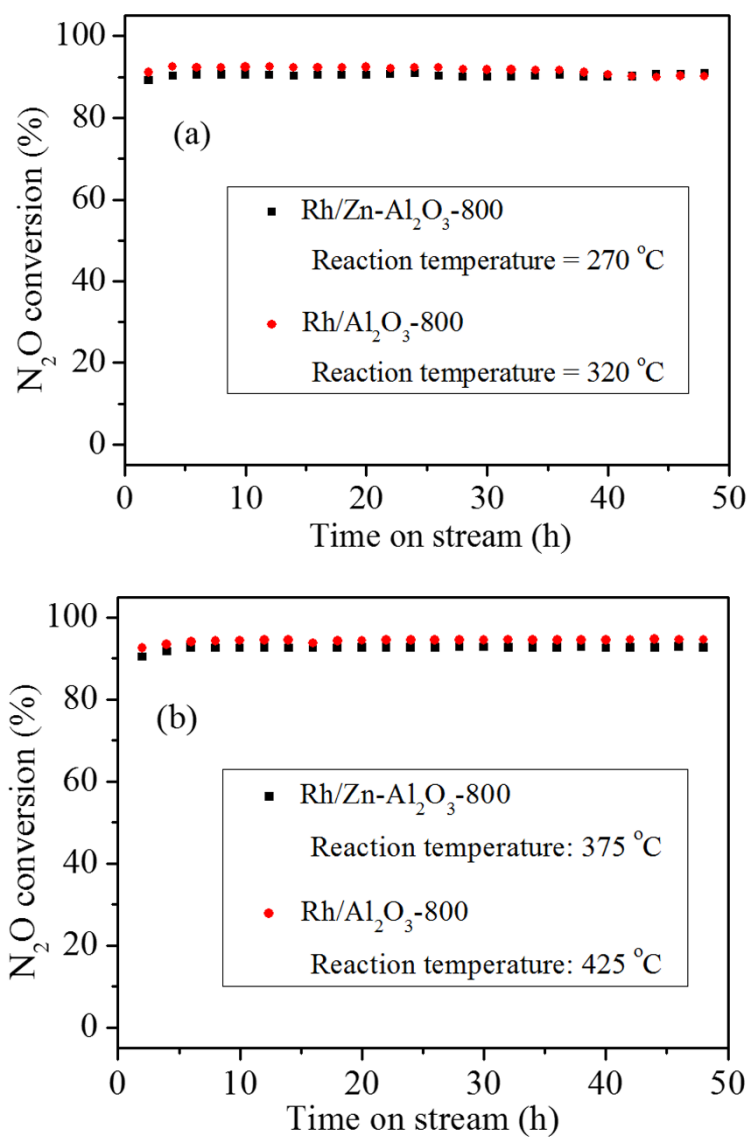

**Fig. S12.** Conversion of N<sub>2</sub>O on Rh/Zn-Al<sub>2</sub>O<sub>3</sub>-800 and Rh/Al<sub>2</sub>O<sub>3</sub>-800 as a function of reaction time in the flow of (a) 0.5% N<sub>2</sub>O/He and (b) 0.5% N<sub>2</sub>O + 2% H<sub>2</sub>O + 5% O<sub>2</sub>/He.



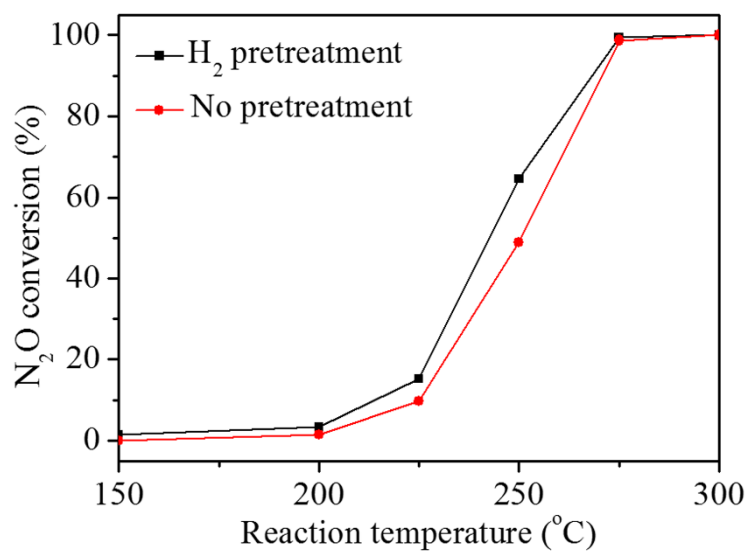

**Fig. S13.** Conversion of N<sub>2</sub>O on Rh/Zn-Al<sub>2</sub>O<sub>3</sub>-800 catalyst with and without H<sub>2</sub> pretreatment (400 °C for 2 h).

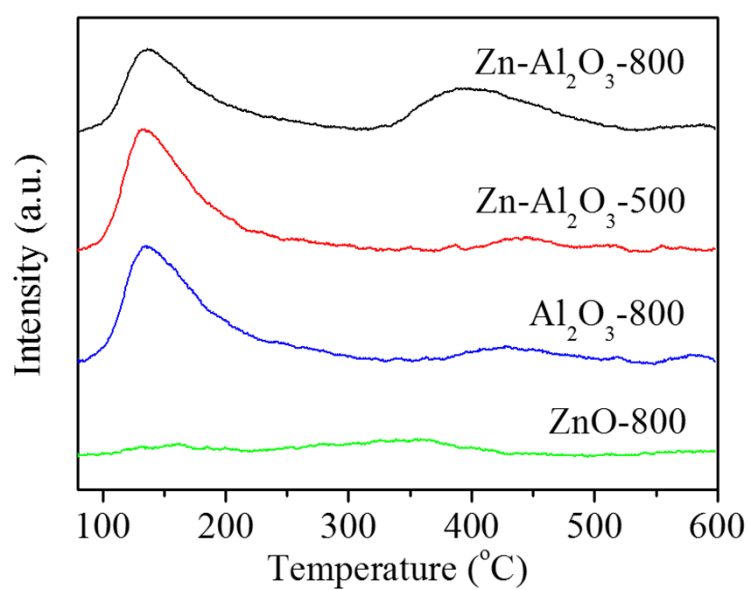

**Fig. S14.** CO<sub>2</sub>-TPD profiles of Zn-Al<sub>2</sub>O<sub>3</sub>-800, Zn-Al<sub>2</sub>O<sub>3</sub>-500, Al<sub>2</sub>O<sub>3</sub>-800, and ZnO-800.

**Table S1** Activities of some catalysts for N<sub>2</sub>O decomposition in reported literature

| Catalyst                                            | Mass of catalyst (g) | Active element content (wt%) | Flow rate (cm <sup>3</sup> min <sup>-1</sup> ) | Gas composition                                              | T <sub>50</sub> (°C) | T <sub>90</sub> (°C) | Reference |
|-----------------------------------------------------|----------------------|------------------------------|------------------------------------------------|--------------------------------------------------------------|----------------------|----------------------|-----------|
| Rh/Zn-Al <sub>2</sub> O <sub>3</sub> -800           | 0.5                  | 1.1                          | 60                                             | 0.5% N <sub>2</sub> O                                        | 251                  | 271                  | this work |
| Rh/Zn-Al <sub>2</sub> O <sub>3</sub> -800           | 0.5                  | 1.1                          | 60                                             | 0.5%N <sub>2</sub> O + 5%O <sub>2</sub> + 2%H <sub>2</sub> O | 333                  | 371                  | this work |
| Rh/Al <sub>2</sub> O <sub>3</sub>                   | 0.5                  | 1.0                          | 60                                             | 0.5% N <sub>2</sub> O                                        | 289                  | 318                  | this work |
| Rh/Al <sub>2</sub> O <sub>3</sub>                   | 0.5                  | 1.0                          | 60                                             | 0.5%N <sub>2</sub> O + 5%O <sub>2</sub> + 2%H <sub>2</sub> O | 388                  | 421                  | this work |
| Rh/TiO <sub>2</sub>                                 | 0.5                  | 1.0                          | 60                                             | 0.5% N <sub>2</sub> O                                        | 310                  | 340                  | [24]      |
| Rh/SiO <sub>2</sub>                                 | 0.5                  | 1.0                          | 60                                             | 0.5% N <sub>2</sub> O                                        | 324                  | 360                  | [24]      |
| Rh/CeO <sub>2</sub>                                 | 0.5                  | 1.0                          | 60                                             | 0.5% N <sub>2</sub> O                                        | 223                  | 250                  | [26]      |
| Rh/HAP-PEG-200                                      | 0.5                  | 0.97                         | 60                                             | 0.5% N <sub>2</sub> O                                        | 223                  | 245                  | [26]      |
| Rh/HAP-PEG-200                                      | 0.5                  | 0.97                         | 60                                             | 0.5%N <sub>2</sub> O + 5%O <sub>2</sub> + 2%H <sub>2</sub> O | 344                  | 386                  | [26]      |
| Rh/USY                                              | 0.05                 | 2.0                          | 50                                             | 0.095% N <sub>2</sub> O                                      | 237                  | 258                  | [21]      |
| Cu-ZSM-11                                           | 0.2                  | 3.06                         | 60                                             | 0.5% N <sub>2</sub> O                                        | 348                  | 373                  | [46]      |
| Fe-ZSM-11                                           | 0.2                  | 3.90                         | 60                                             | 0.5% N <sub>2</sub> O                                        | 435                  | 465                  | [5]       |
| Co-ZSM-11                                           | 0.2                  | 3.59                         | 60                                             | 0.5% N <sub>2</sub> O                                        | 387                  | 435                  | [51]      |
| Pd/CeO <sub>2</sub>                                 | 0.1                  | 0.5                          | 100                                            | 0.1% N <sub>2</sub> O                                        | 470                  | – <sup>a</sup>       | [57]      |
| Pt/CeO <sub>2</sub>                                 | 0.1                  | 0.5                          | 100                                            | 0.1% N <sub>2</sub> O                                        | 462                  | – <sup>a</sup>       | [57]      |
| Ir/CeO <sub>2</sub> -Al <sub>2</sub> O <sub>3</sub> | 0.1                  | 0.5                          | 150                                            | 0.1% N <sub>2</sub> O                                        | 474                  | 535                  | [58]      |

<sup>a</sup> Conversion did not reach 90% under the reaction condition.
